# Supplementary material for: Highly emissive supramolecular gold(i)–BTD materials
Source: Royal Society of Chemistry journal article supplement (doi:10.1039/d2dt00950a), 2022-01-01
Supplement: d2dt00950a1.pdf [file d2dt00950a1.pdf]

## Highly emissive supramolecular gold(I)-BTD materials

Andrea Pinto,<sup>a,b</sup> Marcelo Echeverri,<sup>c</sup> Berta Gómez-Lor<sup>c</sup> and Laura Rodríguez<sup>a,b</sup>

<sup>a</sup> *Departament de Química Inorgànica i Orgànica, Secció de Química Inorgànica,  
Universitat de Barcelona, Martí i Franquès 1-11, E-08028 Barcelona, Spain.*

<sup>b</sup> *Institut de Nanociència i Nanotecnologia (IN<sup>2</sup>UB). Universitat de Barcelona, 08028  
Barcelona, Spain*

<sup>c</sup> *Instituto de Ciencia de Materiales de Madrid, CSIC Cantoblanco, 28049 Madrid,  
Spain*

## Supporting information

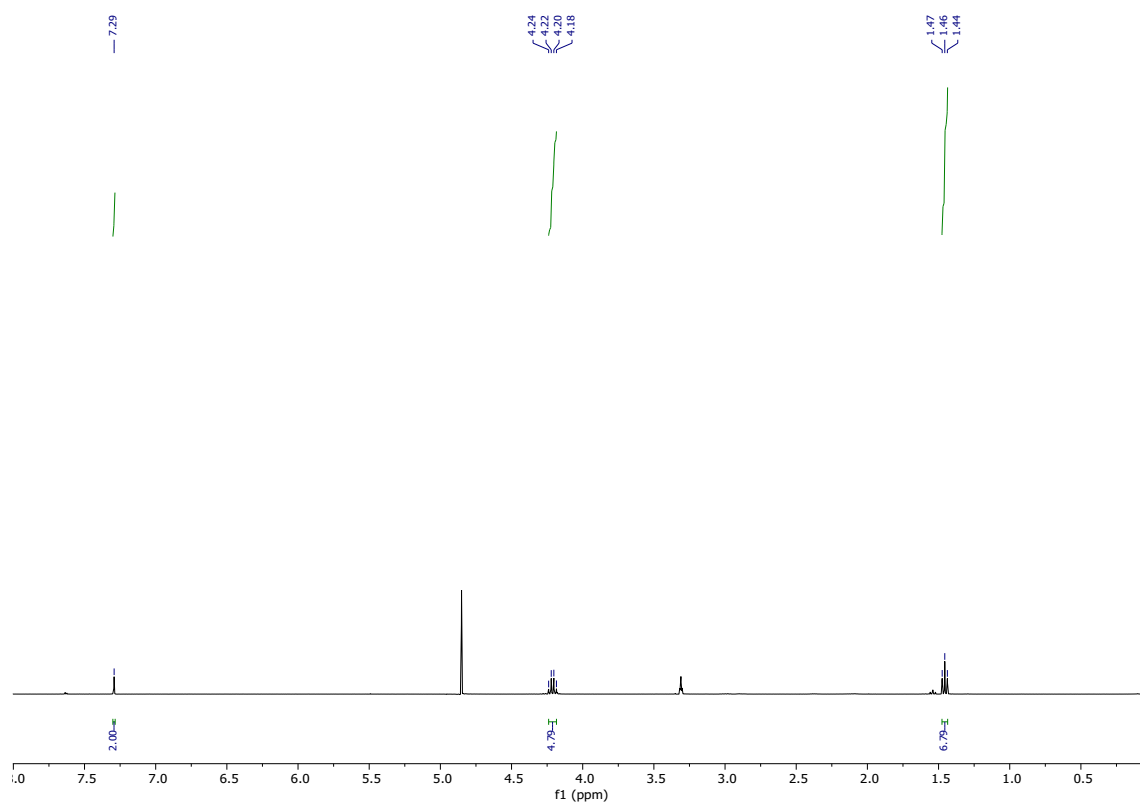

**Figure S1.**  $^1\text{H}$  NMR spectra of  $[\text{AuCl}(\text{Im}1)]$  in  $\text{CD}_3\text{OD}$ .

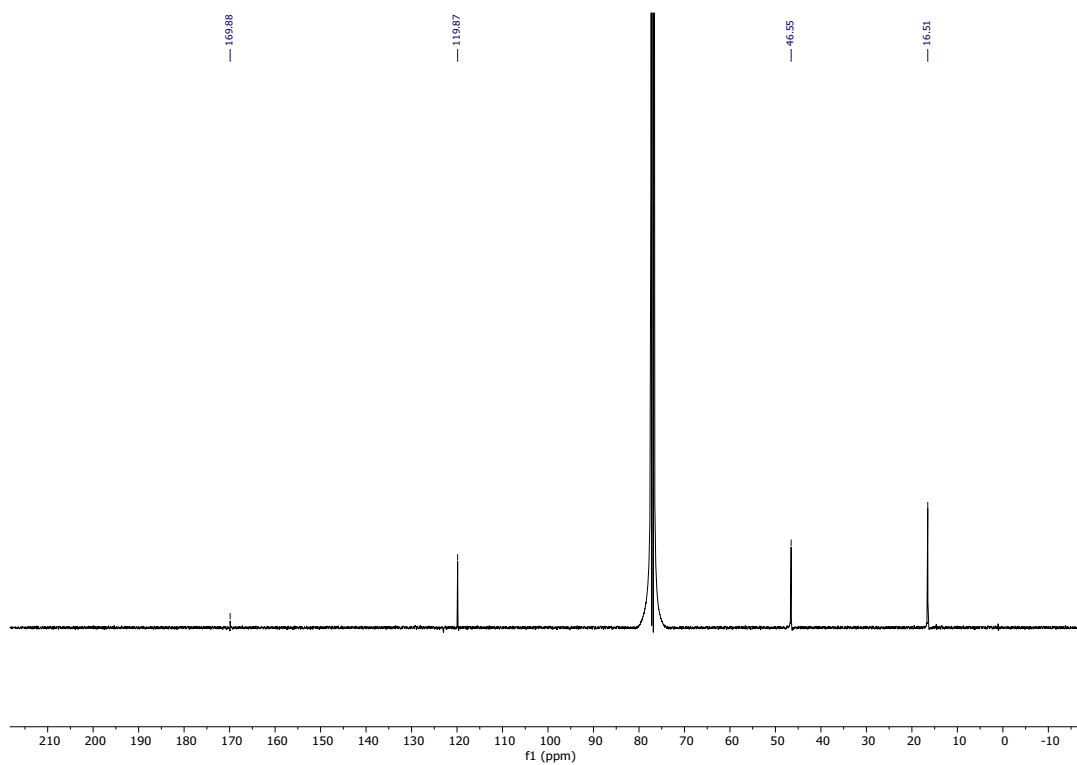

**Figure S2.**  $^{13}\text{C}$  NMR spectra of  $[\text{AuCl}(\text{Im}1)]$  in  $\text{CDCl}_3$ .

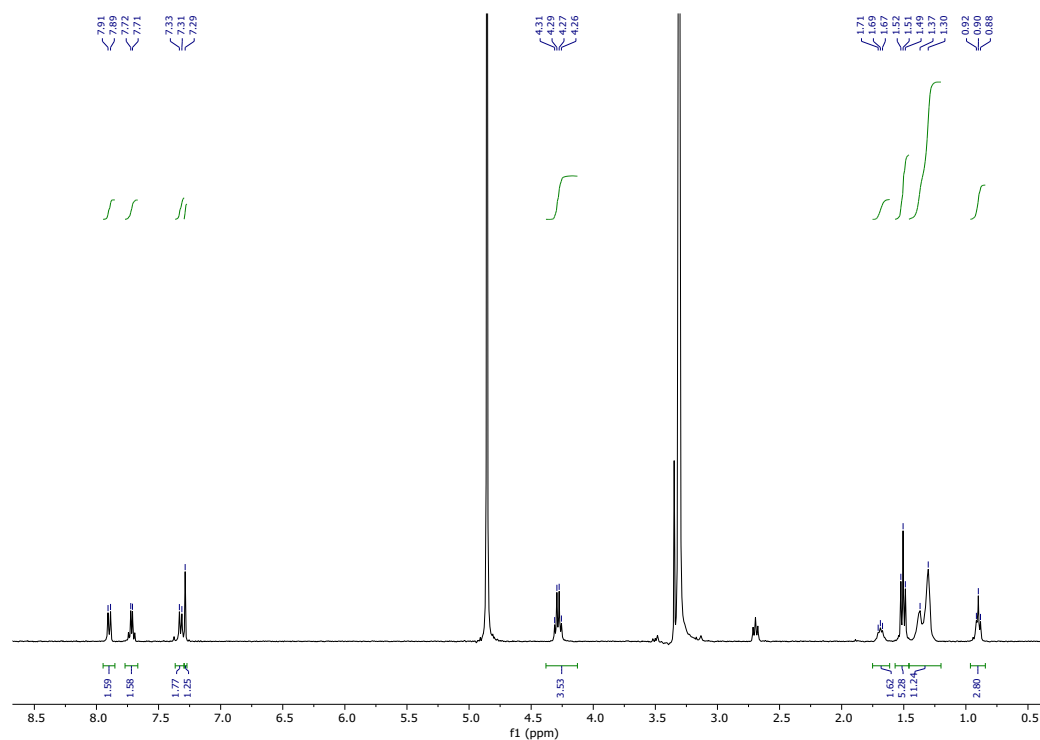

**Figure S3.**  $^1\text{H}$  NMR spectra of **1** in  $\text{CD}_3\text{OD}$ .

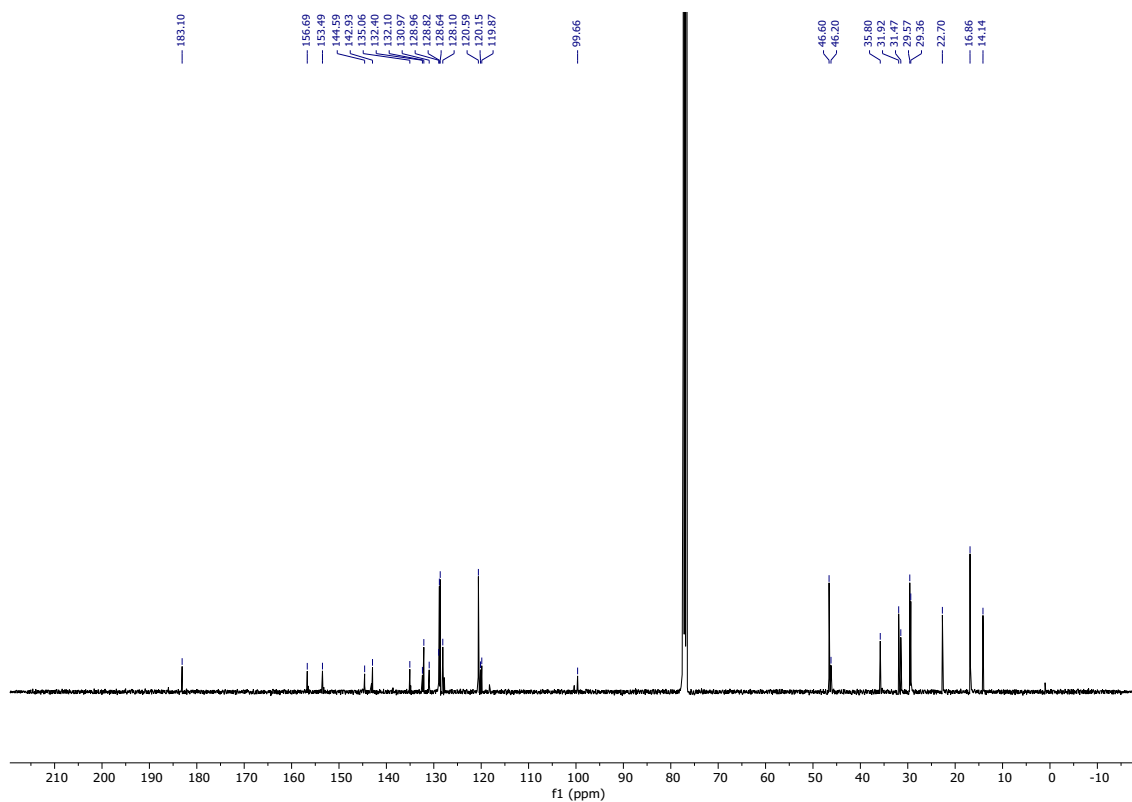

**Figure S4.**  $^{13}\text{C}$  NMR spectra of **1** in  $\text{CDCl}_3$ .

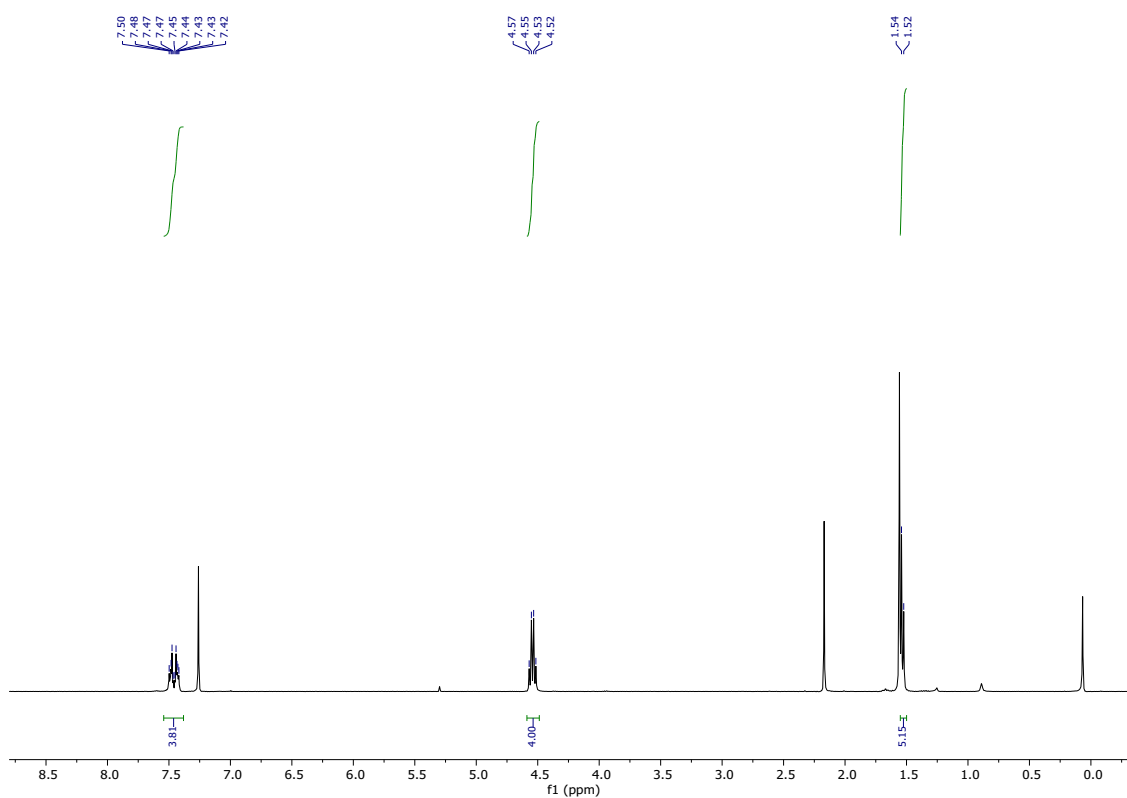

Figure S5.  $^1\text{H-NMR}$  spectra of  $[\text{AuCl}(\text{Im}2)]$  in  $\text{CDCl}_3$ .

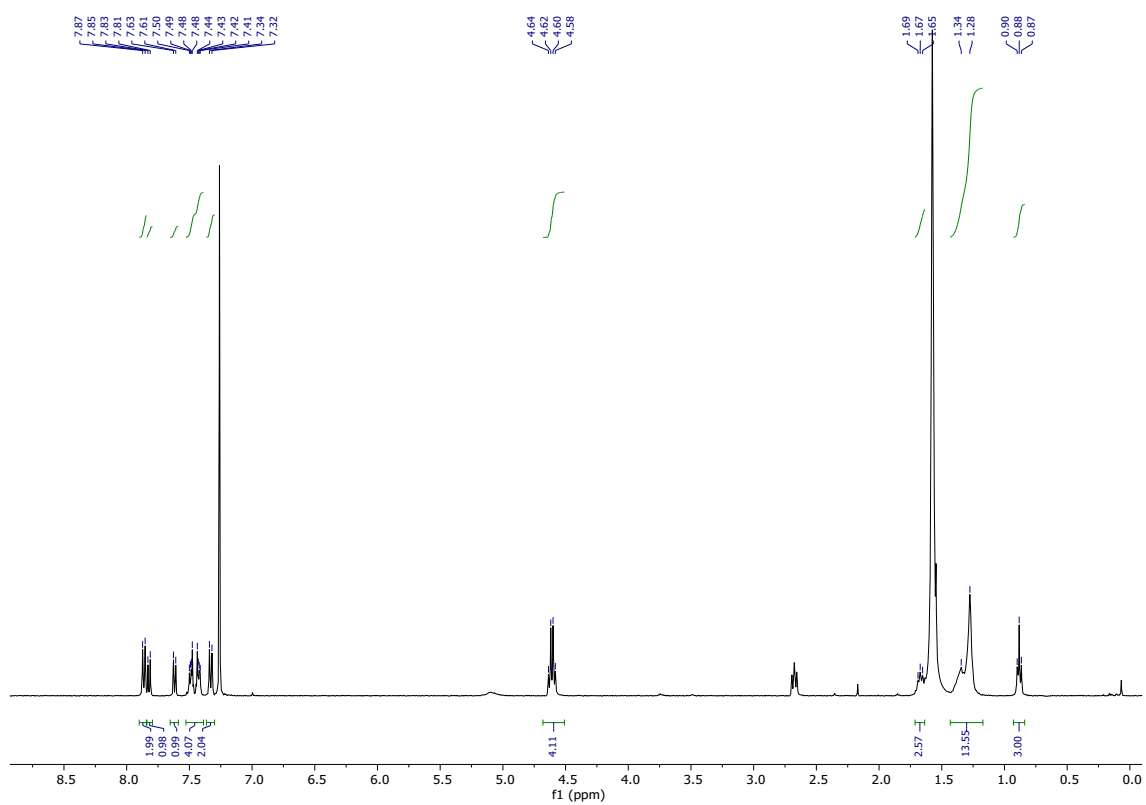

Figure S6.  $^1\text{H-NMR}$  spectra of **2** in  $\text{CDCl}_3$ .

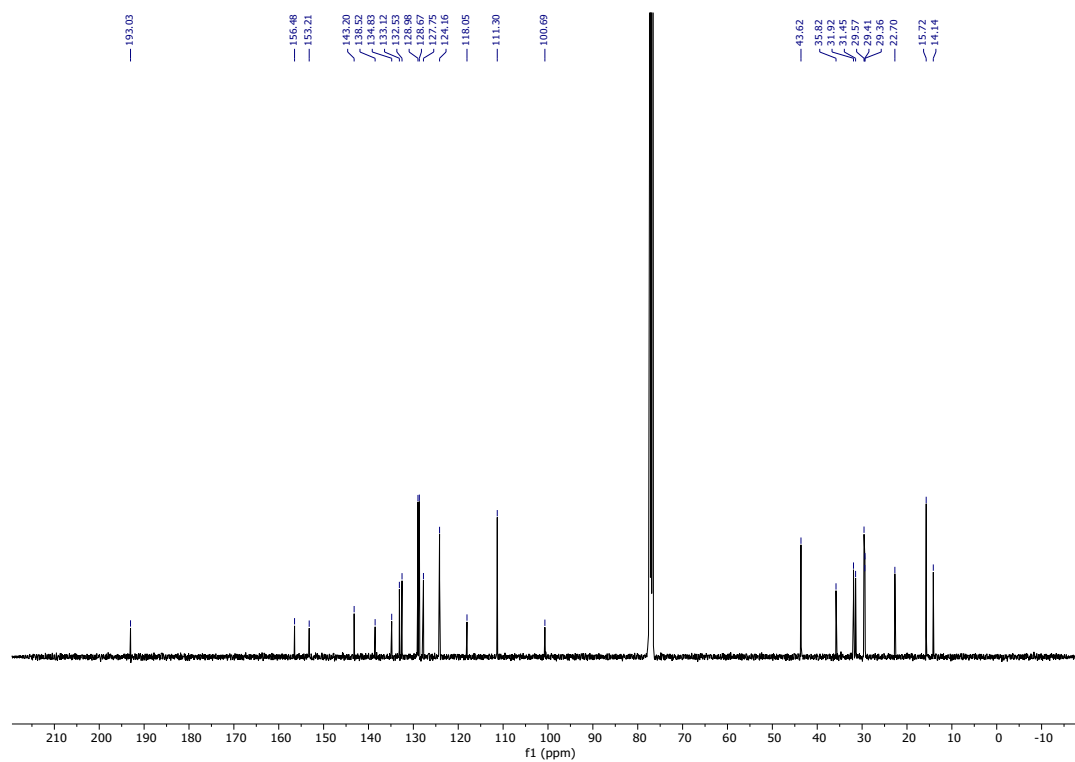

Figure S7.  $^{13}\text{C}$  NMR spectra of **2** in  $\text{CDCl}_3$ .

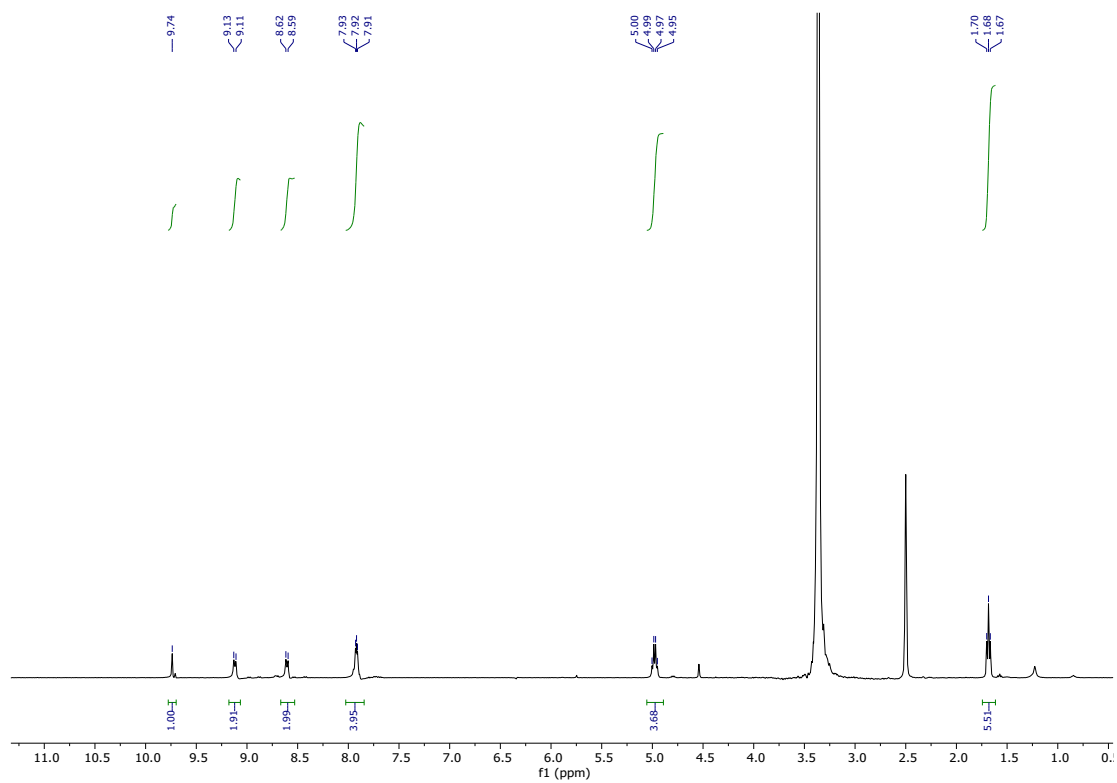

Figure S8.  $^1\text{H}$ -NMR spectra of **Im3** in  $\text{DMSO-d}_6$ .

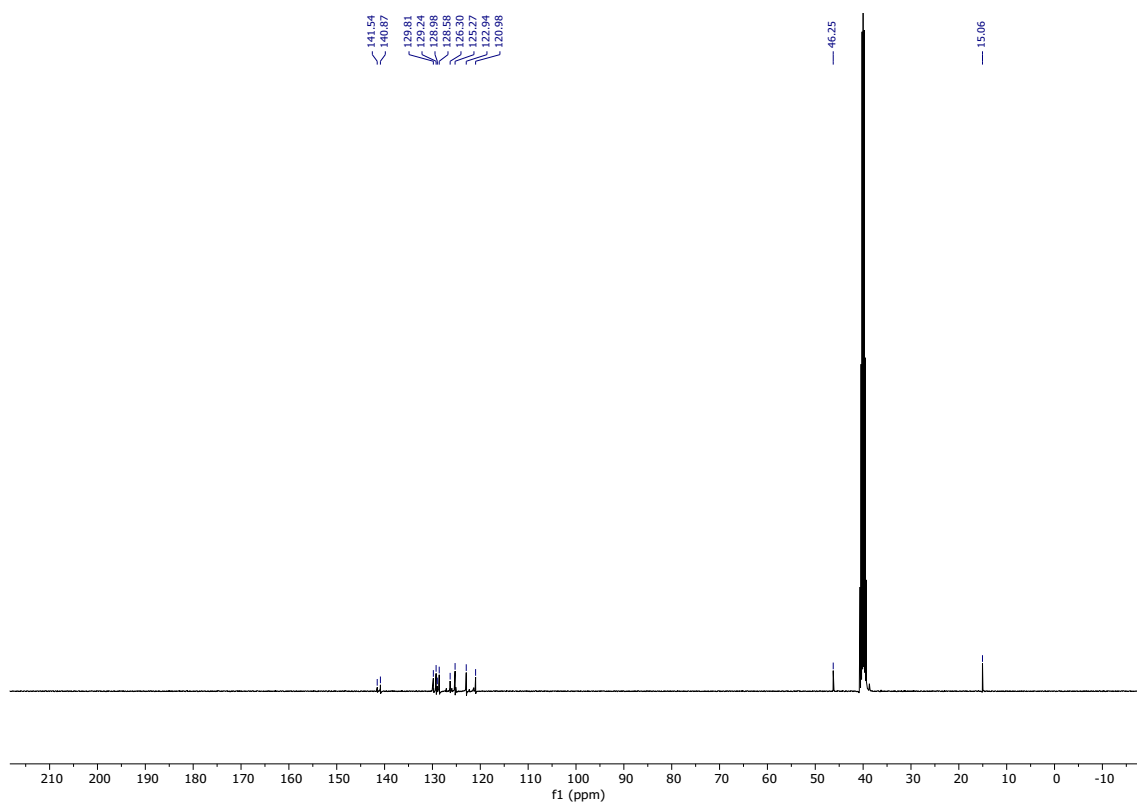

Figure S9.  $^{13}\text{C}$  NMR spectra of **Im3** in  $\text{DMSO-d}_6$ .

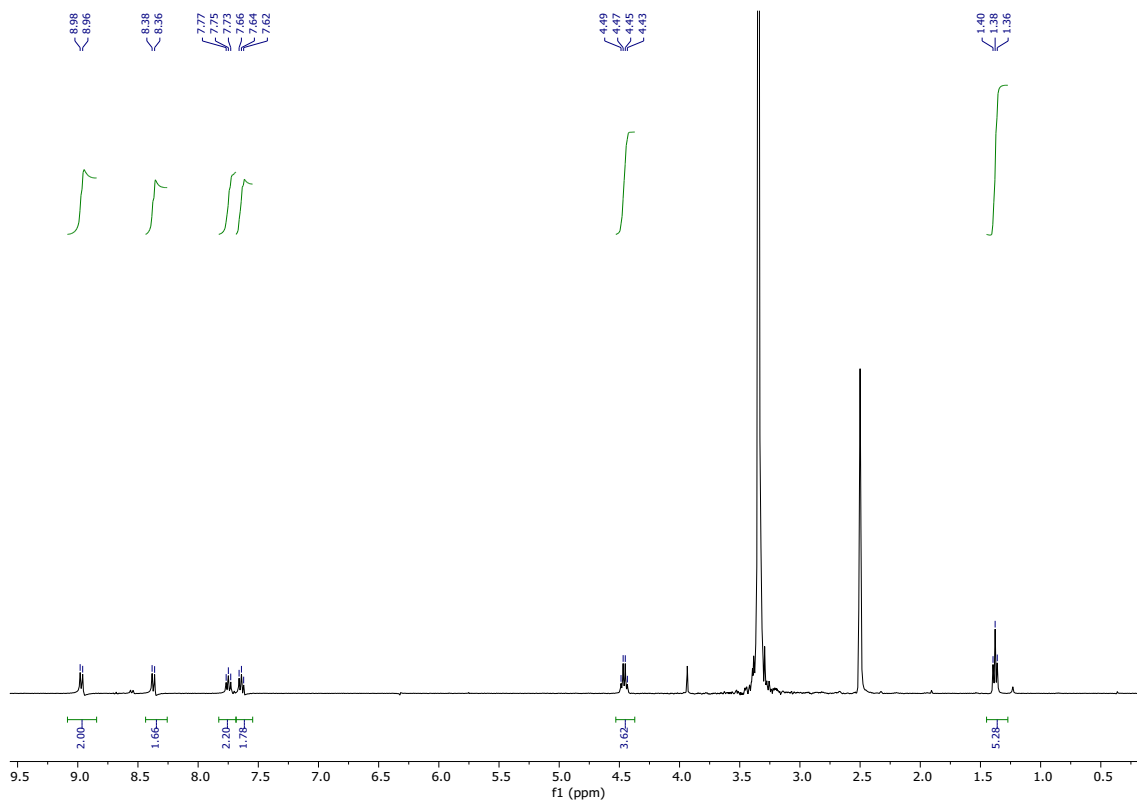

Figure S10.  $^1\text{H}$ -NMR spectra of  $[\text{AuCl}(\text{Im}3)]$  in  $\text{DMSO-d}_6$ .

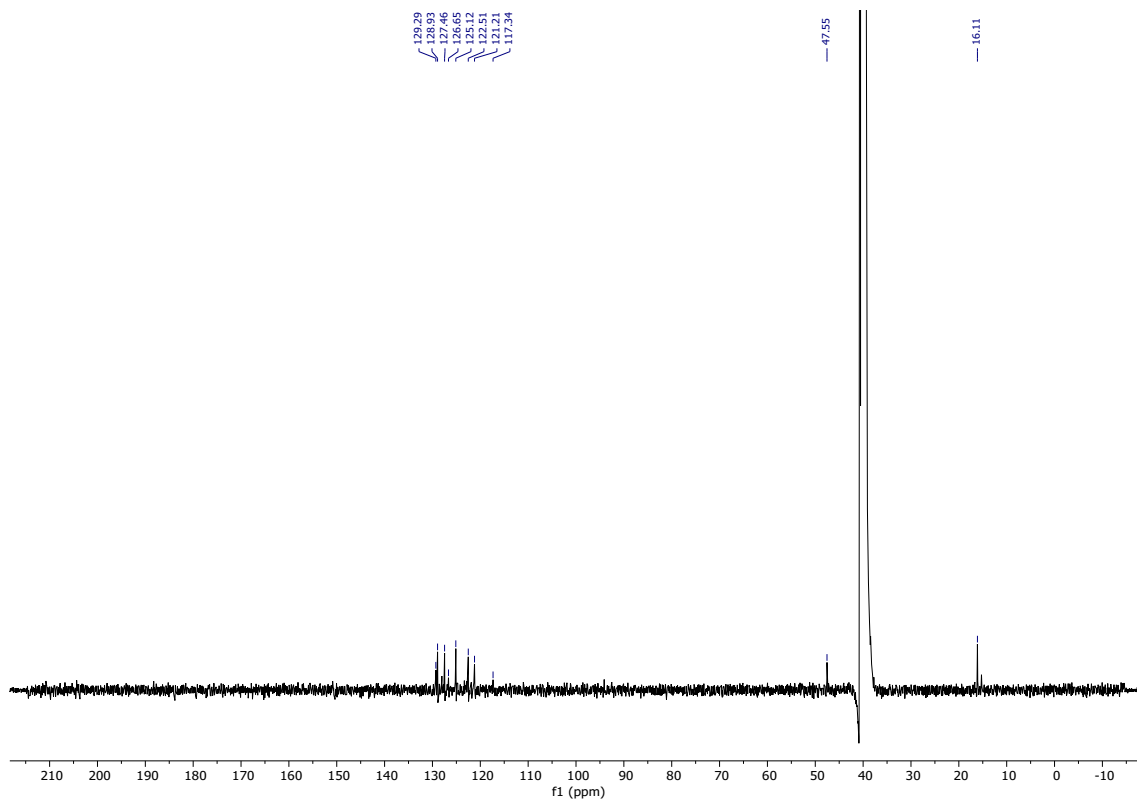

Figure S11.  $^{13}\text{C}$  NMR spectra of  $[\text{AuCl}(\text{Im}3)]$  in  $\text{DMSO-d}_6$ .

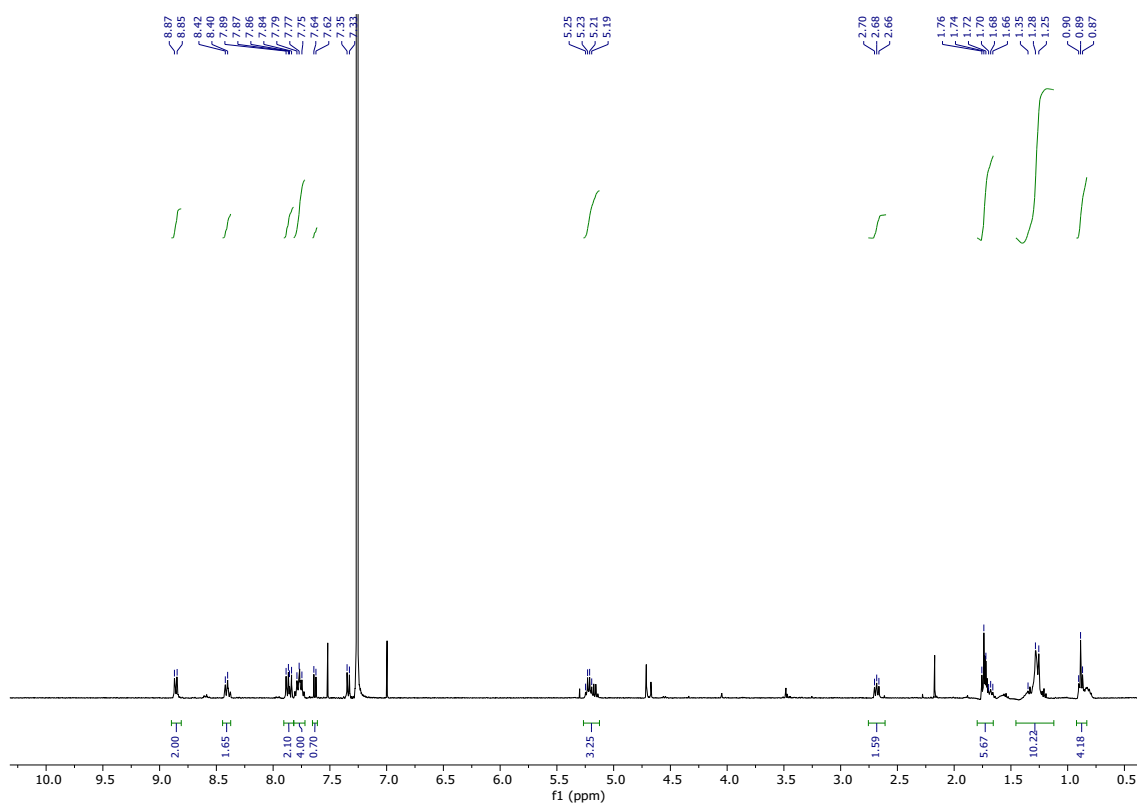

Figure S12.  $^1\text{H}$ -NMR spectra of **3** in  $\text{CDCl}_3$ .

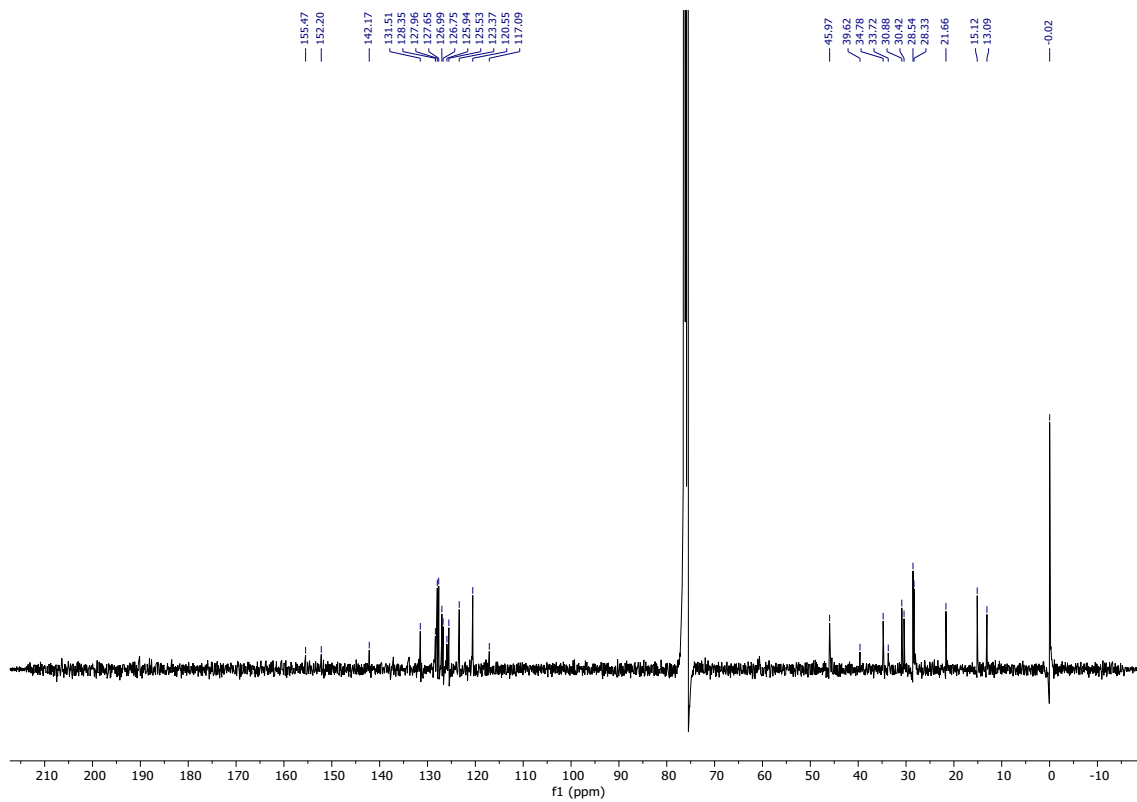

Figure S13.  $^{13}\text{C}$  NMR spectra of **3** in  $\text{CDCl}_3$ .

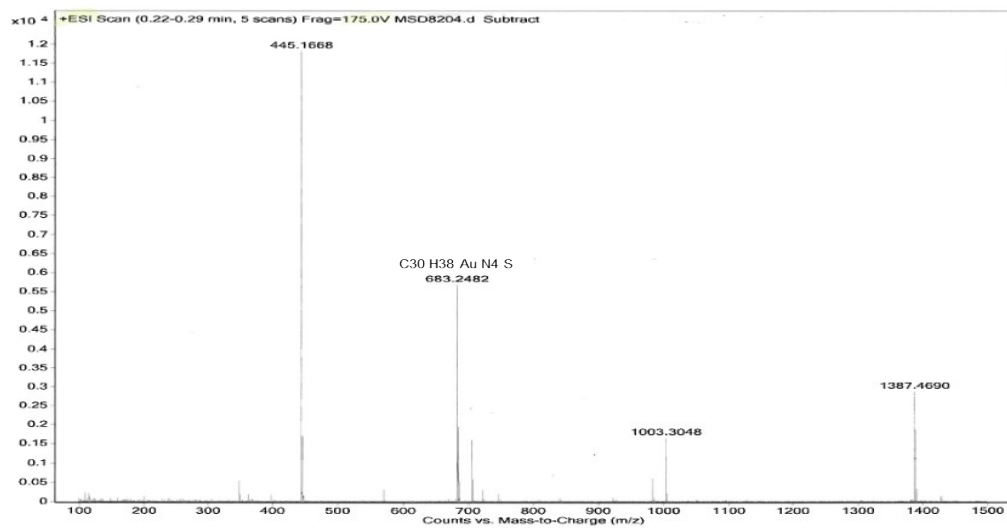

Figure S14. Mass spectra of **1**.



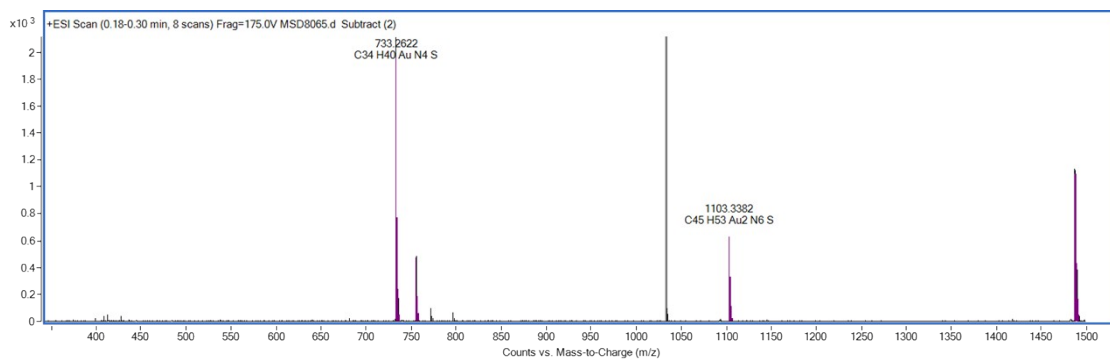

**Figure S15.** Mass spectra of **2**.

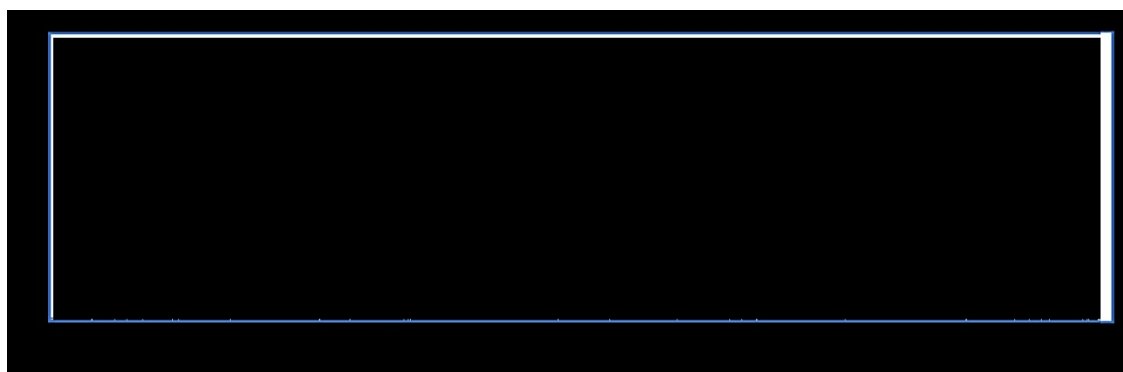

**Figure S16.** Mass spectra of **3**.

**Table S1.** Crystal data and structure for **2** and **3**.

| Compound                               | <b>2</b>                                           | <b>3</b>                                           |
|----------------------------------------|----------------------------------------------------|----------------------------------------------------|
| Formula                                | C <sub>34</sub> H <sub>39</sub> AuN <sub>4</sub> S | C <sub>42</sub> H <sub>43</sub> AuN <sub>4</sub> S |
| Crystal size, nm                       | 0.253 x 0.217 x 0.067                              | 0.265 x 0.215 x 0.108                              |
| Fw                                     | 732.72                                             | 848.83                                             |
| Temp., K                               | 200(2)                                             | 200(2)                                             |
| Wavelength, Å                          | 0.71073                                            | 0.71073                                            |
| Crystal system                         | Triclinic                                          | Triclinic                                          |
| Space group                            | P-1                                                | P-1                                                |
| a, Å                                   | 9.4798(3)                                          | 11.1580(4)                                         |
| b, Å                                   | 12.6101(3)                                         | 12.2292(5)                                         |
| c, Å                                   | 14.3603(4)                                         | 14.6217(7)                                         |
| α, °                                   | 97.6410(10)                                        | 86.513(3)                                          |
| β, °                                   | 100.288(2)                                         | 68.107(2)                                          |
| γ, °                                   | 109.9550(10)                                       | 84.983(2)                                          |
| Volume, Å <sup>3</sup>                 | 1552.35(8)                                         | 1843.34(14)                                        |
| Z                                      | 2                                                  | 2                                                  |
| D <sub>calc</sub> , mg m <sup>-3</sup> | 1.568                                              | 1.529                                              |
| Abs. coef., mm <sup>-1</sup>           | 4.835                                              | 4.085                                              |
| F(000)                                 | 732                                                | 852                                                |
| θ range for data coll, °               | 1.76 to 25.35                                      | 3.00 to 25.35                                      |
| Reflns coll./independent               | 82971/5673                                         | 62560/6749                                         |
| Data/restraint/parameters              | 5673/0/364                                         | 6749/0/452                                         |
| GOF on F <sup>2</sup>                  | 1.107                                              | 1.066                                              |
| Final R index (I > 2σ(I))              | R1 = 0.0138,wR2 = 0.0350                           | R1 = 0.0195,wR2 = 0.0578                           |
| R index (all data)                     | R1 = 0.0157,wR2 = 0.0356                           | R1 = 0.0216,wR2 = 0.0590                           |
| Peak and hole, e Å <sup>-3</sup>       | 0.323 and -0.328                                   | 1.133 and -0.299                                   |
| CCDC                                   | 2160186                                            | 2160187                                            |

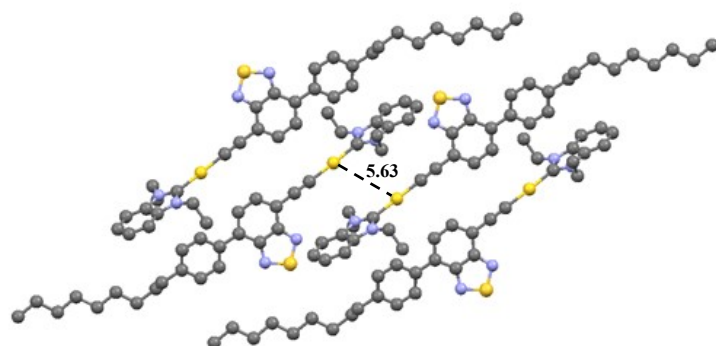

**Figure S17.** Representation of the X-ray crystal structure of **2**.

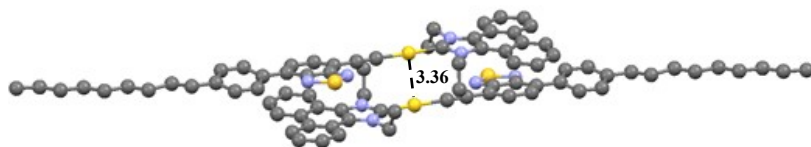

**Figure S18.** Representation of the X-ray crystal structure of **3**.

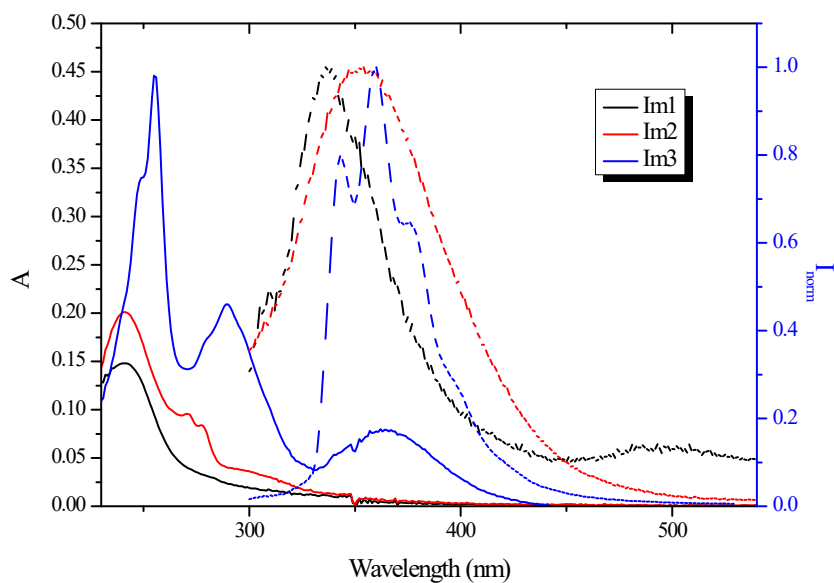

**Figure S19.** Absorption (solid lines) and emission (dash lines) spectra of **Im1-3** in dichloromethane.

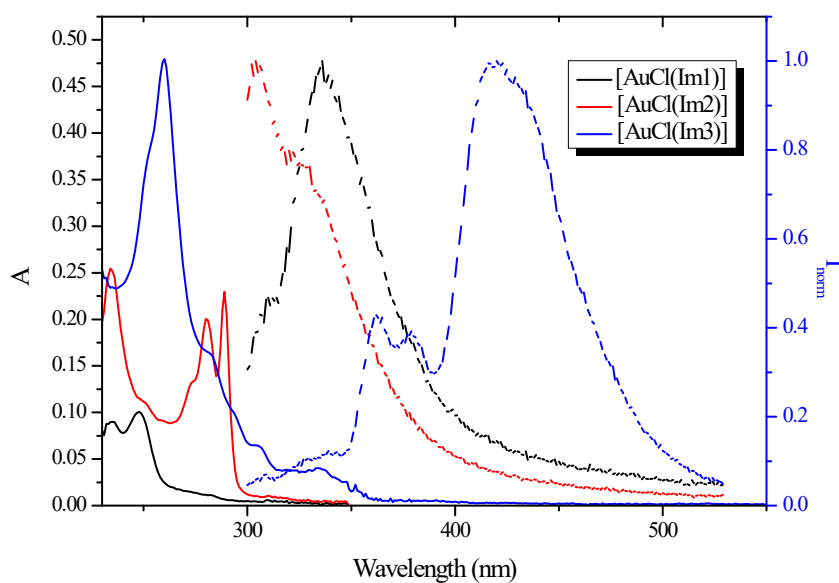

**Figure S20.** Absorption (solid lines) and emission (dash lines) spectra of **[AuCl(Im1-3)]** in dichloromethane.

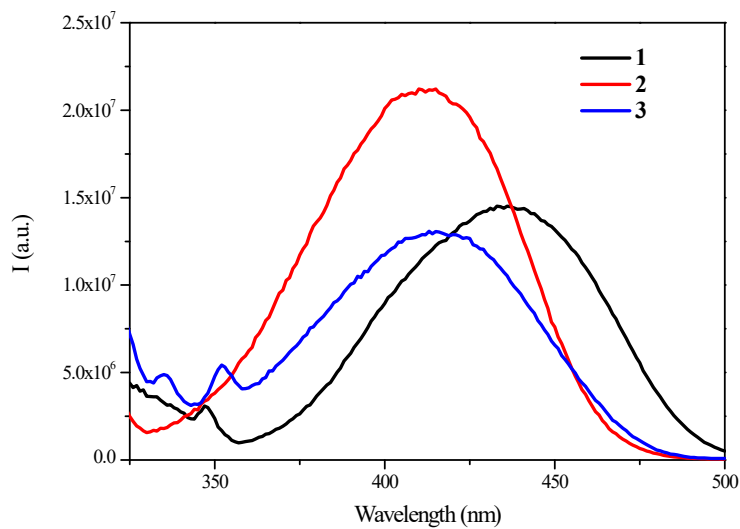

**Figure S21.** Excitation spectra of gold(I) complexes **1-3** in dichloromethane.

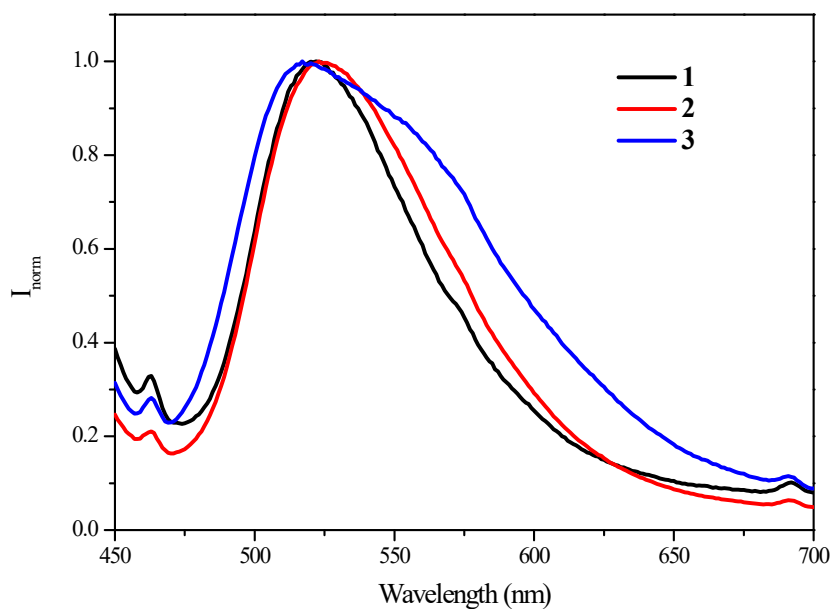

**Figure S22.** Emission spectra of gold(I) complexes **1-3** in solid state. **Emission of 3** corresponds to the as-obtained polymorph.

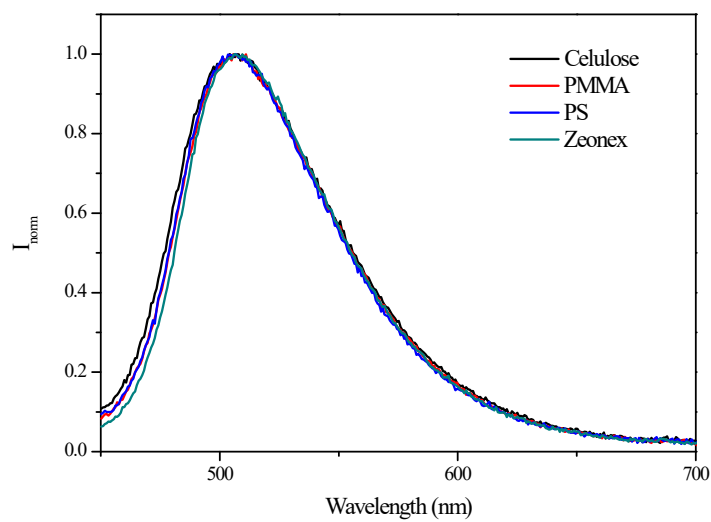

**Figure S23.** Normalized emission spectra of **2** in different matrices.

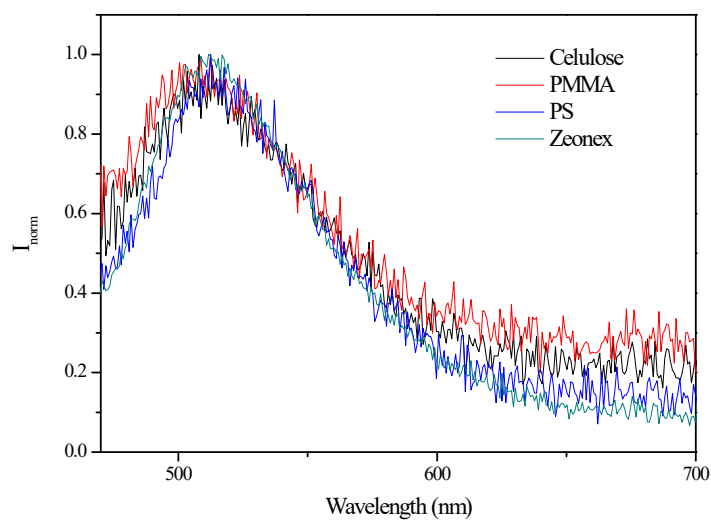

**Figure S24.** Normalized emission spectra of **1** in different matrices.

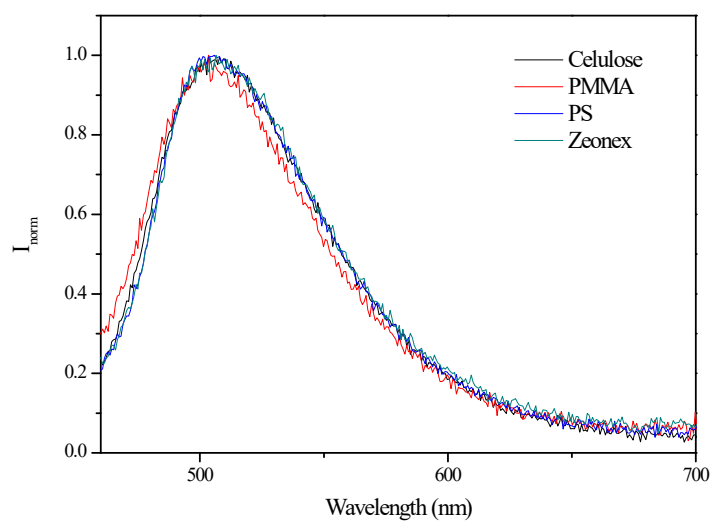

**Figure S25.** Normalized emission spectra of **3** in different matrices.

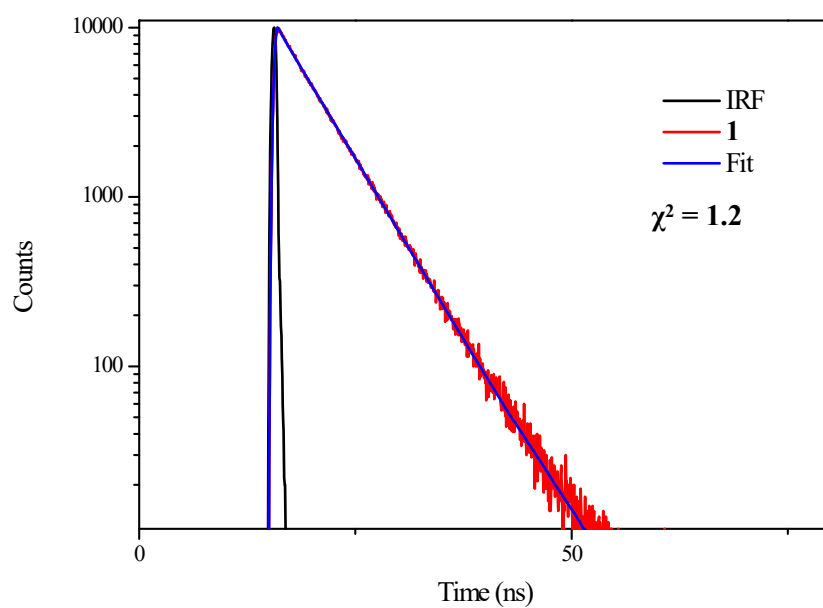

**Figure S26.** Fluorescent lifetime of **1** in dichloromethane solution.

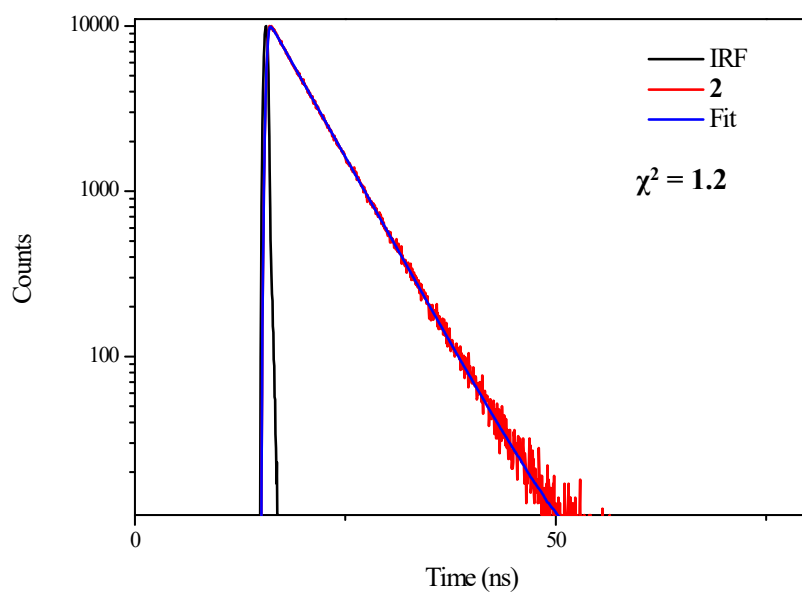

**Figure S27.** Fluorescent lifetime of **2** in dichloromethane solution.

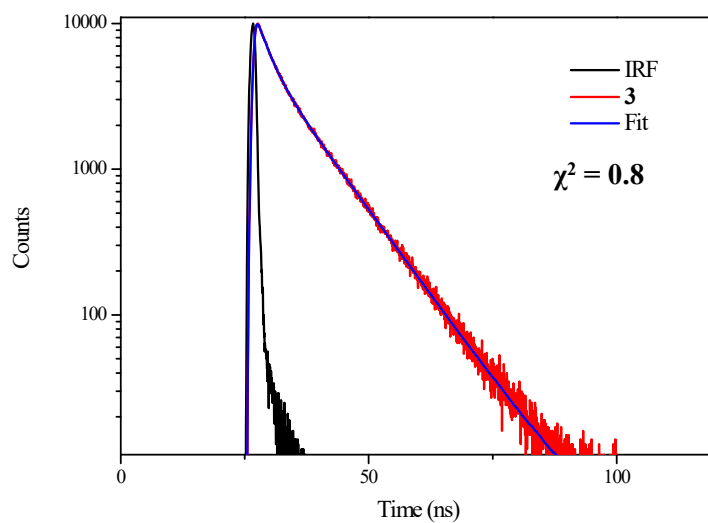

**Figure S28.** Fluorescent lifetime of **3** in dichloromethane solution.



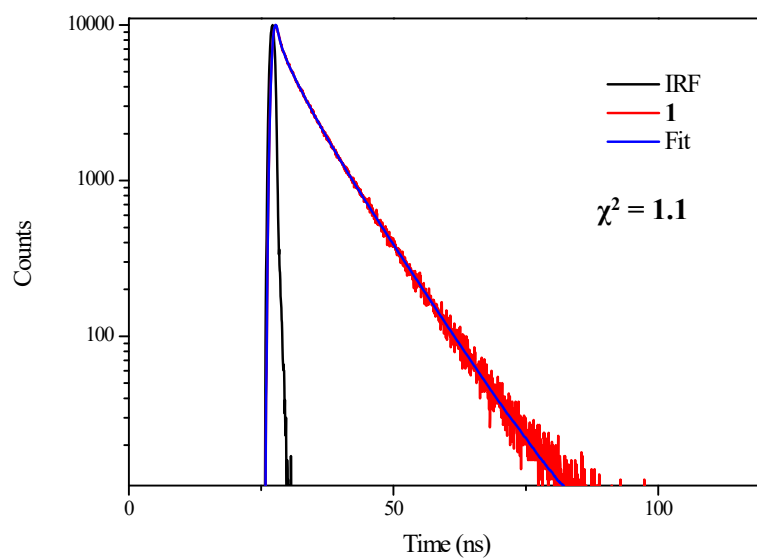

**Figure S29.** Fluorescent lifetime of **1** in cellulose.

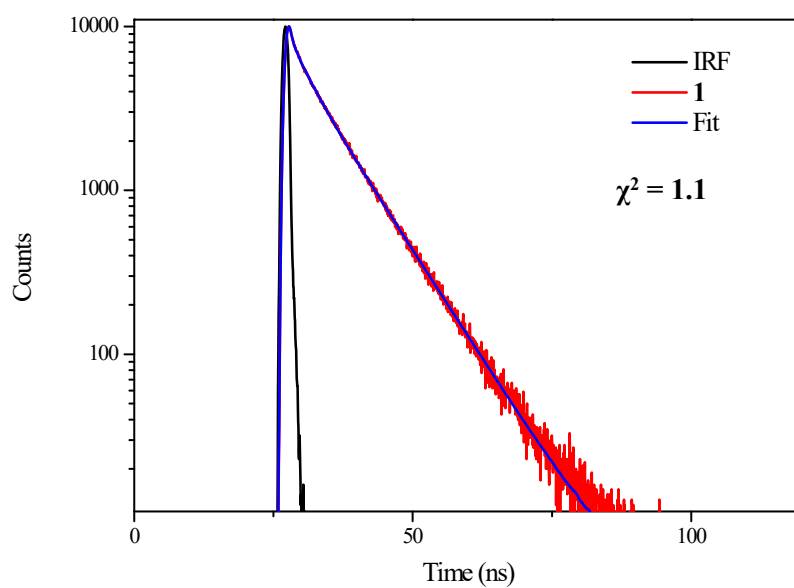

**Figure S30.** Fluorescent lifetime of **1** in PMMA.

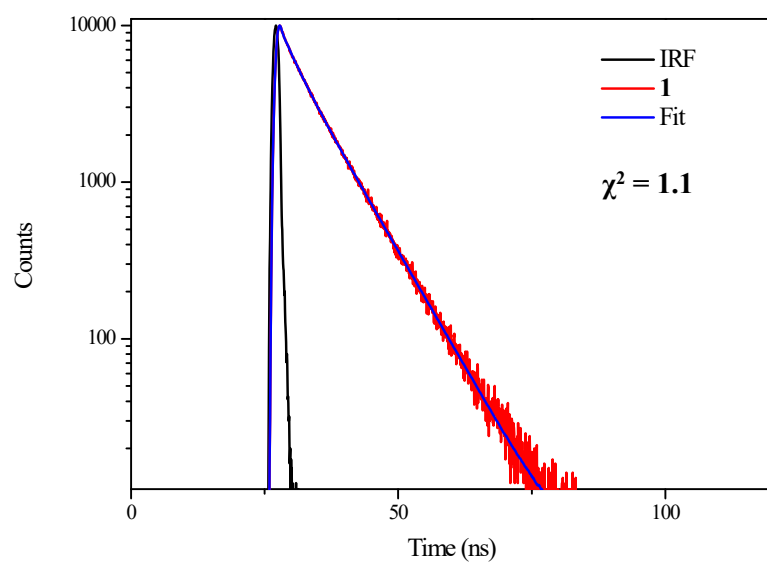

**Figure S31.** Fluorescent lifetime of **1** in PS.

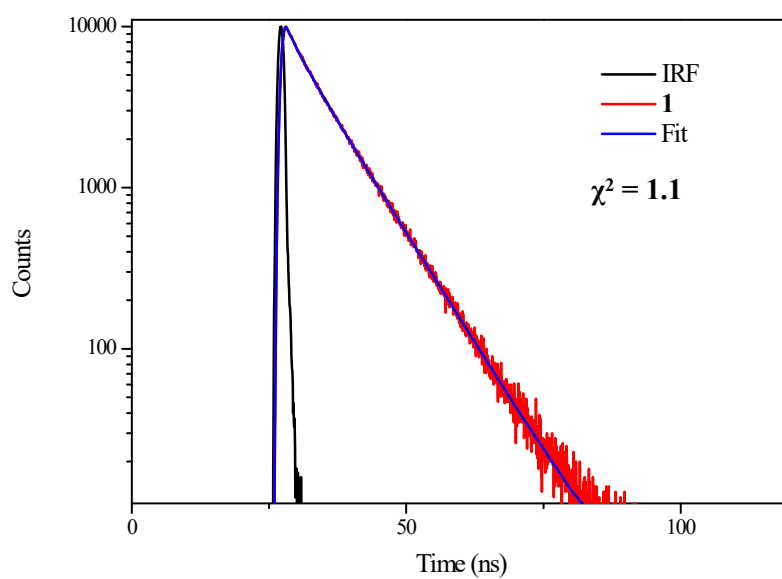

**Figure S32.** Fluorescent lifetime of **1** in Zeonex.

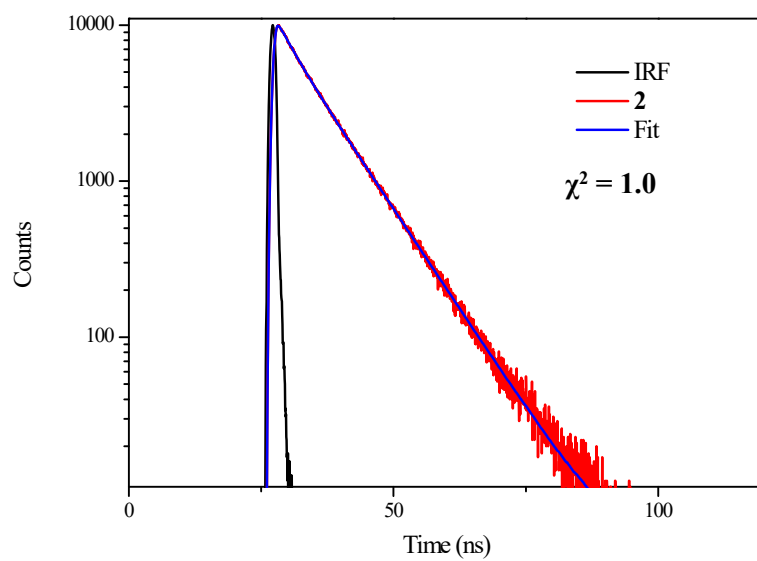

**Figure S33.** Fluorescent lifetime of **2** in cellulose.

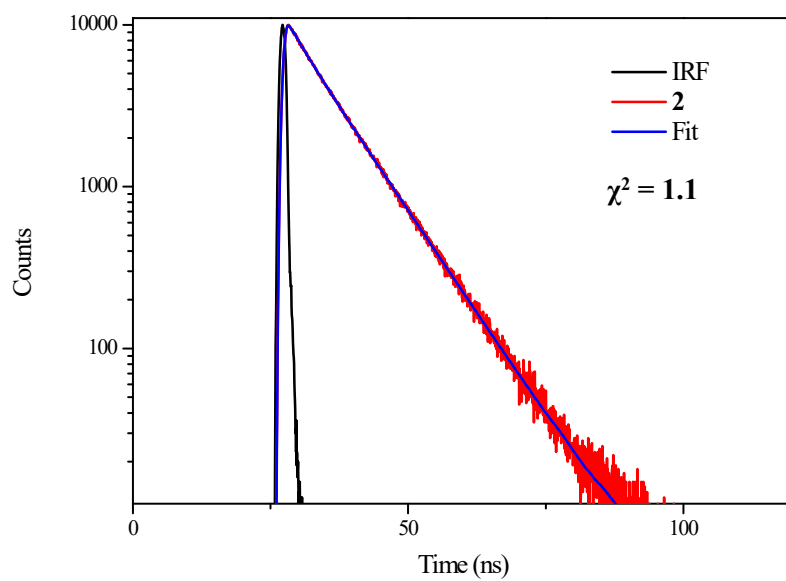

**Figure S34.** Fluorescent lifetime of **2** in PMMA.

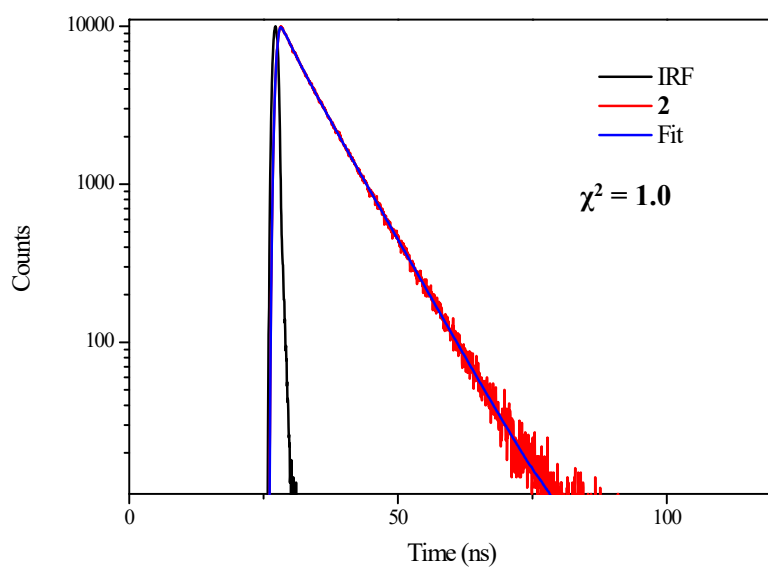

**Figure S35.** Fluorescent lifetime of 2 in PS.

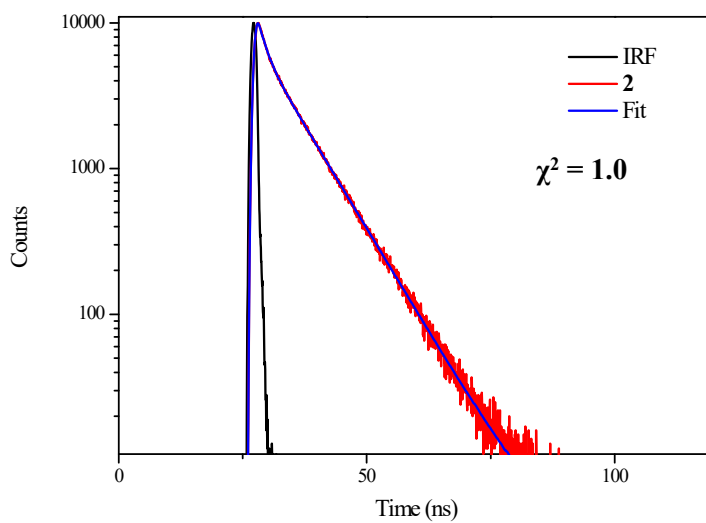

**Figure S36.** Fluorescent lifetime of 2 in Zeonex.

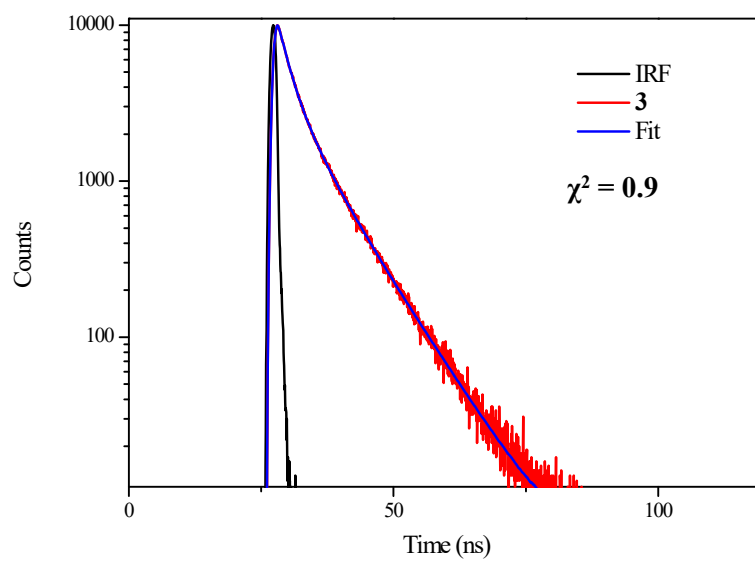

**Figure S37.** Fluorescent lifetime of **3** in cellulose.

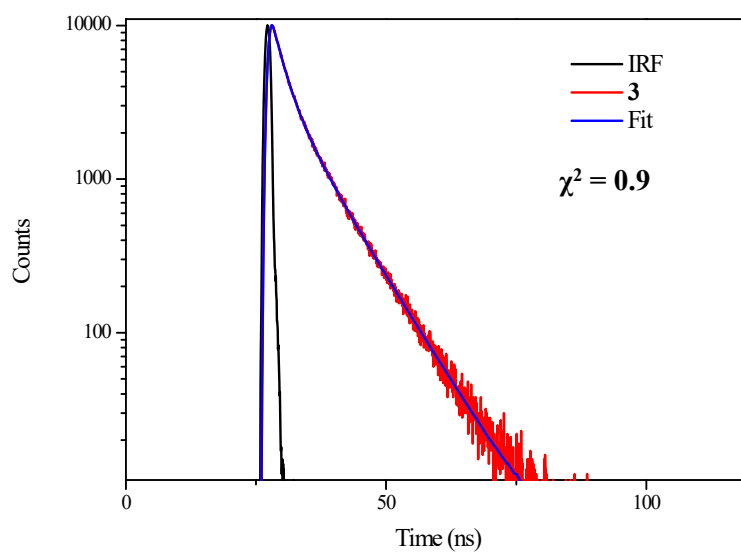

**Figure S38.** Fluorescent lifetime of **3** in PMMA.

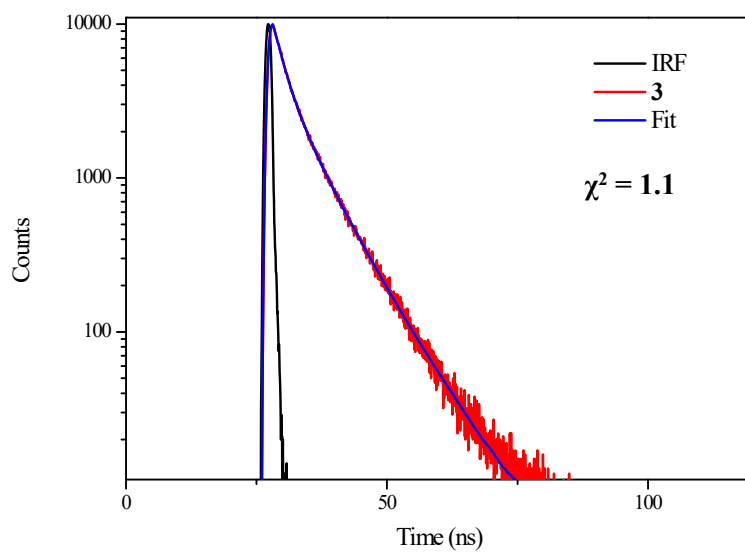

**Figure S39.** Fluorescent lifetime of **3** in PS.

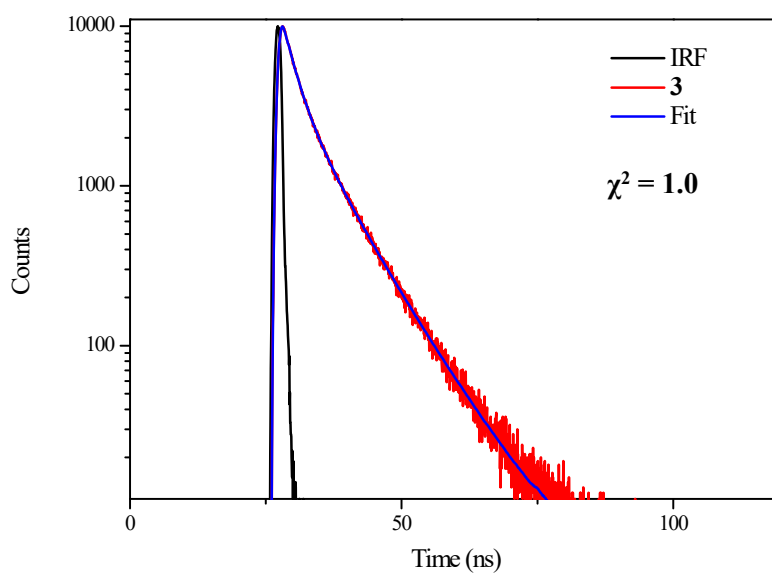

**Figure S40.** Fluorescent lifetime of **3** in Zeonex.
